# Supplementary material for: ﻿Lithocarpusdahuensis (Fagaceae), a new species from Fujian Province based on morphology and genomic data
Source: PhytoKeys. 2023 Mar 17;222:1–18. doi: 10.3897/phytokeys.222.99370 (PMC10209513; doi:10.3897/phytokeys.222.99370)
Supplement: Supplementary material 1 — Supplementary data [file phytokeys-222-001_article-99370__-s001.doc]

**Appendix A. Supplementary data**

Table S1. The information of the phylogenetic analysis of the species used in the present study (nrITS)

|  | Family | Genus | Species | GenBank accession number |
| --- | --- | --- | --- | --- |
| 1 | Fagaceae | *Lithocarpus* | ***Lithocarpus dahuensis*** | OP957303.1 |
| 2 | *Lithocarpus konishii* | - |
| 3 | *Lithocarpus aggregatus* | MF770309.1 |
| 4 | *Lithocarpus amygdalifolius* | KJ685164.1 |
| 5 | *Lithocarpus balansae* | EU195795.1 |
| 6 | *Lithocarpus beccarianus* | AF389101.1 |
| 7 | *Lithocarpus bennettii* | AF389093.1 |
| 8 | *Lithocarpus bidoupensis* | KY940070.1 |
| 9 | *Lithocarpus blumeanus* | AF389091.1 |
| 10 | *Lithocarpus bullatus* | AY040409.1 |
| 11 | *Lithocarpus brevicaudatus* | KJ685165.1 |
| 12 | *Lithocarpus calophyllus* | KJ685166.1 |
| 13 | *Lithocarpus cleistocarpus* | EF057114.1 |
| 14 | *Lithocarpus clementianus* | AF389107.1 |
| 15 | *Lithocarpus coalitus* | MF770305.1 |
| 16 | *Lithocarpus crassifolius* | MW044410.1 |
| 17 | *Lithocarpus corneus* | AY040440.1 |
| 18 | *Lithocarpus cooperatus* | AY040407.1 |
| 19 | *Lithocarpus conocarpus* | AF389095.1 |
| 20 | *Lithocarpus chrysocomus* | KJ685167.1 |
| 21 | *Lithocarpus dahuoaiensis* | KY436002.1 |
| 22 | *Lithocarpus dealbatus* | LT984601.1 |
| 23 | *Lithocarpus densiflorus* | AY040370.1 |
| 24 | *Lithocarpus dodonaeifolius* | KJ685170.1 |
| 25 | *Lithocarpus echinophorus* | AY040437.1 |
| 26 | *Lithocarpus echinifer* | AF389089.1 |
| 27 | *Lithocarpus edulis* | AY040439.1 |
| 28 | *Lithocarpus encleisocarpus* | AF389094.1 |
| 29 | *Lithocarpus ewyckii* | AY040413.1 |
| 30 | *Lithocarpus fenestratus* | MW044411.1 |
| 31 | *Lithocarpus fenzelianus* | KJ685172.1 |
| 32 | *Lithocarpus ferrugineus* | AY040414.1 |
| 33 | *Lithocarpus formosanus* | KJ685173.1 |
| 34 | *Lithocarpus floccosus* | KP096022.1 |
| 35 | *Lithocarpus glaber* | AY040435.1 |
| 36 | *Lithocarpus gigantophyllus* | MF770299.1 |
| 37 | *Lithocarpus grandifolius* | AY040450.1 |
| 38 | *Lithocarpus hancei* | MF952868.1 |
| 39 | *Lithocarpus handelianus* | KJ685185.1 |
| 40 | *Lithocarpus hatusimae* | AY040410.1 |
| 41 | *Lithocarpus havilandii* | AF389092.1 |
| 42 | *Lithocarpus harlandii* | KJ685189.1 |
| 43 | *Lithocarpus henryi* | EF057110.1 |
| 44 | *Lithocarpus hongiaoensis* | KY851759.1 |
| 45 | *Lithocarpus iteaphyllus* | KP092753.1 |
| 46 | *Lithocarpus keningauensis* | AF389106.1 |
| 47 | *Lithocarpus kalkmanii* | AF389102.1 |
| 48 | *Lithocarpus lemeeanus* | MF770306.1 |
| 49 | *Lithocarpus leptogyne* | AY040416.1 |
| 50 | *Lithocarpus lepidocarpus* | KJ685194.1 |
| 51 | *Lithocarpus lampadarius* | AF389099.1 |
| 52 | *Lithocarpus laoticus* | EU195797.1 |
| 53 | *Lithocarpus licentii* | MF770301.1 |
| 54 | *Lithocarpus litseifolius* | KP092755.1 |
| 55 | *Lithocarpus longipedicellatus* | MF770304.1 |
| 56 | *Lithocarpus lucidus* | AY040408.1 |
| 57 | *Lithocarpus luteus* | AF389096.1 |
| 58 | *Lithocarpus nantoensis* | KJ685197.1 |
| 59 | *Lithocarpus naiadarum* | KJ685196.1 |
| 60 | *Lithocarpus nitidinux* | MF952869.1 |
| 61 | *Lithocarpus nieuwenhuisii* | AY040400.1 |
| 62 | *Lithocarpus ombrophilus* | MF770297.1 |
| 63 | *Lithocarpus ochrocarpus* | MF770298.1 |
| 64 | *Lithocarpus oleifolius* | KJ685198.1 |
| 65 | *Lithocarpus pachylepis* | AY040442.1 |
| 66 | *Lithocarpus papillifer* | AY040418.1 |
| 67 | *Lithocarpus pachyphyllus* | AY040446.1 |
| 68 | *Lithocarpus palungensis* | AF389103.1 |
| 69 | *Lithocarpus paniculatus* | KJ685199.1 |
| 70 | *Lithocarpus pakhaensis* | OL986335.1 |
| 71 | *Lithocarpus pseudomagneinii* | MF770302.1 |
| 72 | *Lithocarpus pulcher* | AF389104.1 |
| 73 | *Lithocarpus rosthornii* | KJ685201.1 |
| 74 | *Lithocarpus rotundatus* | AF389090.1 |
| 75 | *Lithocarpus ruminatus* | AF389097.1 |
| 76 | *Lithocarpus revolutus* | AF389098.1 |
| 77 | *Lithocarpus rufovillosus* | DQ499087.1 |
| 78 | *Lithocarpus silvicolarum* | KJ685205.1 |
| 79 | *Lithocarpus stenopus* | MF770300.1 |
| 80 | *Lithocarpus skanianus* | MN579529.1 |
| 81 | *Lithocarpus sericobalanus* | AF389105.1 |
| 82 | *Lithocarpus shinsuiensis* | KJ685202.1 |
| 83 | *Lithocarpus taitoensis* | KJ685200.1 |
| 84 | *Lithocarpus truncatus* | MW044415.1 |
| 85 | *Lithocarpus turbinatus* | AF389100.1 |
| 86 | *Lithocarpus uvariifolius* | KJ685212.1 |
| 87 | *Lithocarpus vinhensis* | MF770303 |
| 88 | *Lithocarpus vuquangensis* | KY786083 |
| 89 | *Lithocarpus xylocarpus* | AY040432 |
| 90 | Myricaceae | *Morella* | *Morella rubra* | KP092762.1 |
| 91 | Betulaceae | *Corylus* | *Corylus fargesii* | FJ011741.1 |
| 92 | *Carpinus* | *Carpinus cordata* | FJ011715.1 |

Note: “-” indicate the data is not yet public.

Table S2. The information of the phylogenetic analysis of the species used in the present study (plastid genome)

| N0. | Family | Genus | Species | GenBank accession number |
| --- | --- | --- | --- | --- |
| 1 | Fagaceae | *Lithocarpus* | ***Lithocarpus dahuensis*** | OP954095.1 |
| 2 | *Lithocarpus konishii* | ON422319.1 |
| 3 | *Lithocarpus litseifolius* | NC_063927.1 |
| 4 | *Lithocarpus hancei* | MW375417.1 |
| 5 | *Lithocarpus longinux* | NC_062048.1 |
| 6 | *Lithocarpus dealbatus* | NC_063459.1 |
| 7 | *Lithocarpus balansae* | KP299291.1 |
| 8 | *Lithocarpus fenestratus* | OM112300.1 |
| 9 | *Lithocarpus polystachyus* | OL569560.1 |
| 10 | *Lithocarpus cleistocarpus* | OM112296.1 |
| 11 | *Lithocarpus obscurus* | OM112297.1 |
| 12 | *Lithocarpus glaber* | MZ750954.1 |
| 13 | *Castanea* | *Castanea crenata* | NC_054203.1 |
| 14 | *Castanea mollissima* | MK352487.1 |
| 15 | *Castanea henryi* | MH998384.1 |
| 16 | *Castanea seguinii* | MH998383.1 |
| 17 | *Castanopsis* | *Castanopsis sclerophylla* | NC_044680.1 |
| 18 | *Castanopsis hystrix* | NC_061039.1 |
| 19 | *Castanopsis carlesii* | NC_057119.1 |
| 20 | *Castanopsis hainanensis* | NC_037389.1 |
| 21 | *Castanopsis concinna* | KT793041.1 |
| 22 | *Cyclobalanopsis* | *Cyclobalanopsis edithae* | NC_059007.1 |
| 23 | *Fagus* | *Fagus crenata* | MH171101.2 |
| 24 | *Fagus longipetiolata* | MZ562567.1 |
| 25 | *Fagus engleriana* | NC_036929.1 |
| 26 | *Fagus hayatae* | MW846258.1 |
| 27 | *Quercus* | *Quercus variabilis* | NC_031356.1 |
| 28 | *Quercus bawanglingensis* | NC_046583.1 |
| 29 | *Quercus baronii* | MW829651.1 |
| 30 | *Trigonobalanus* | *Trigonobalanus doichangensis* | NC_023959.1 |
| 31 | Myricaceae | *Morella* | *Morella rubra* | KY476635.1 |
| 32 | Betulaceae | *Corylus* | *Corylus fargesii* | KX822767.2 |
| 33 | *Carpinus* | *Carpinus cordata* | KY312849.1 |


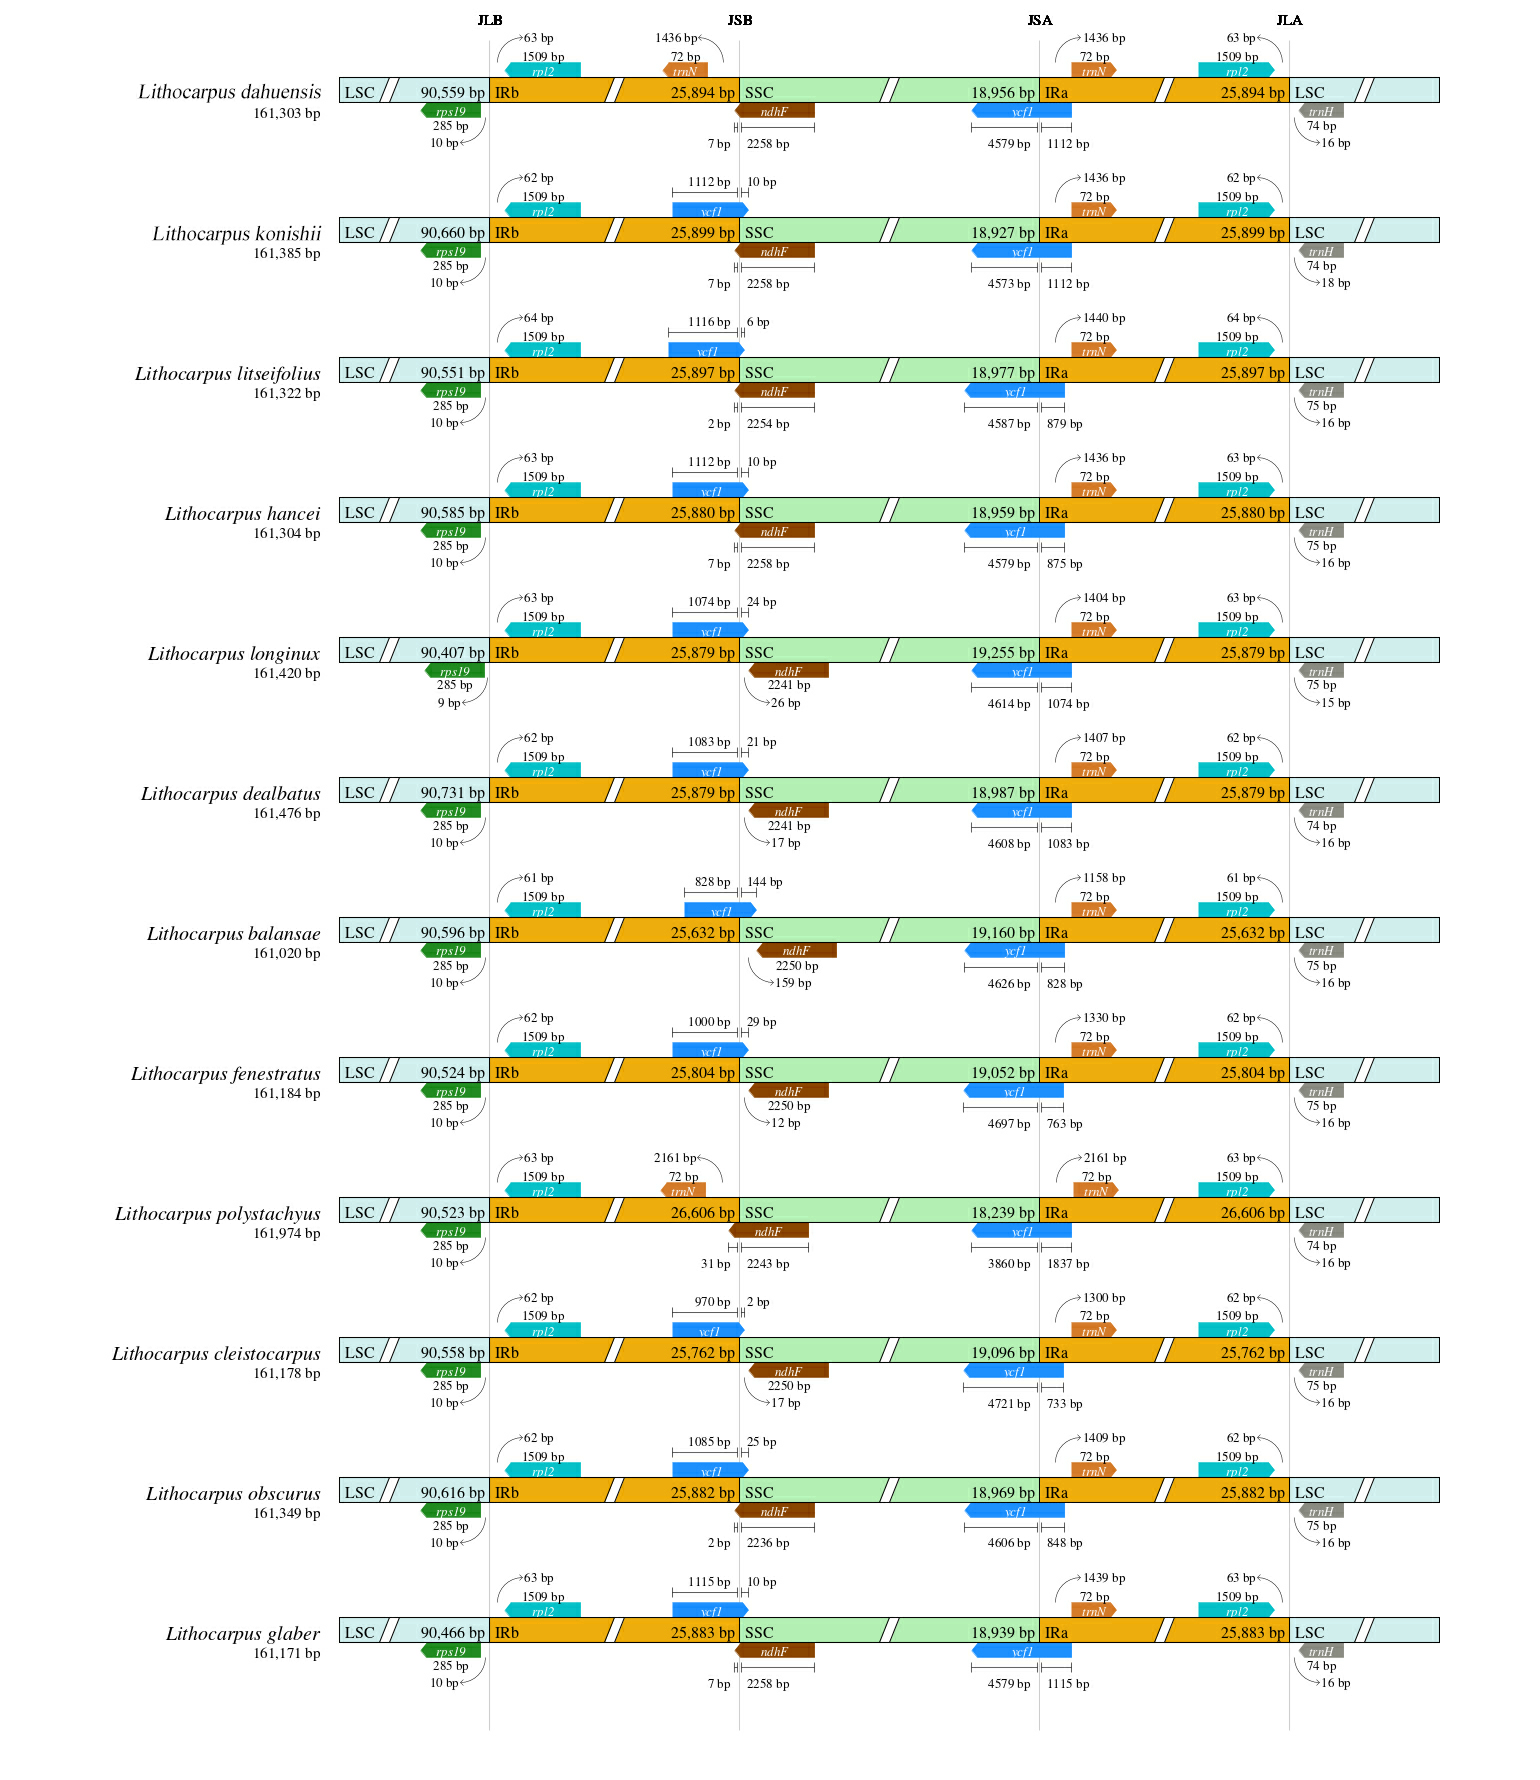


Figure S1. Comparison of the LSC, SSC and IR regions among twelve chloroplast genomes of *Lithocarpus* species. Genes are denoted by colored boxes. The gaps between the genes and boundaries are proportional to the distances in bps.


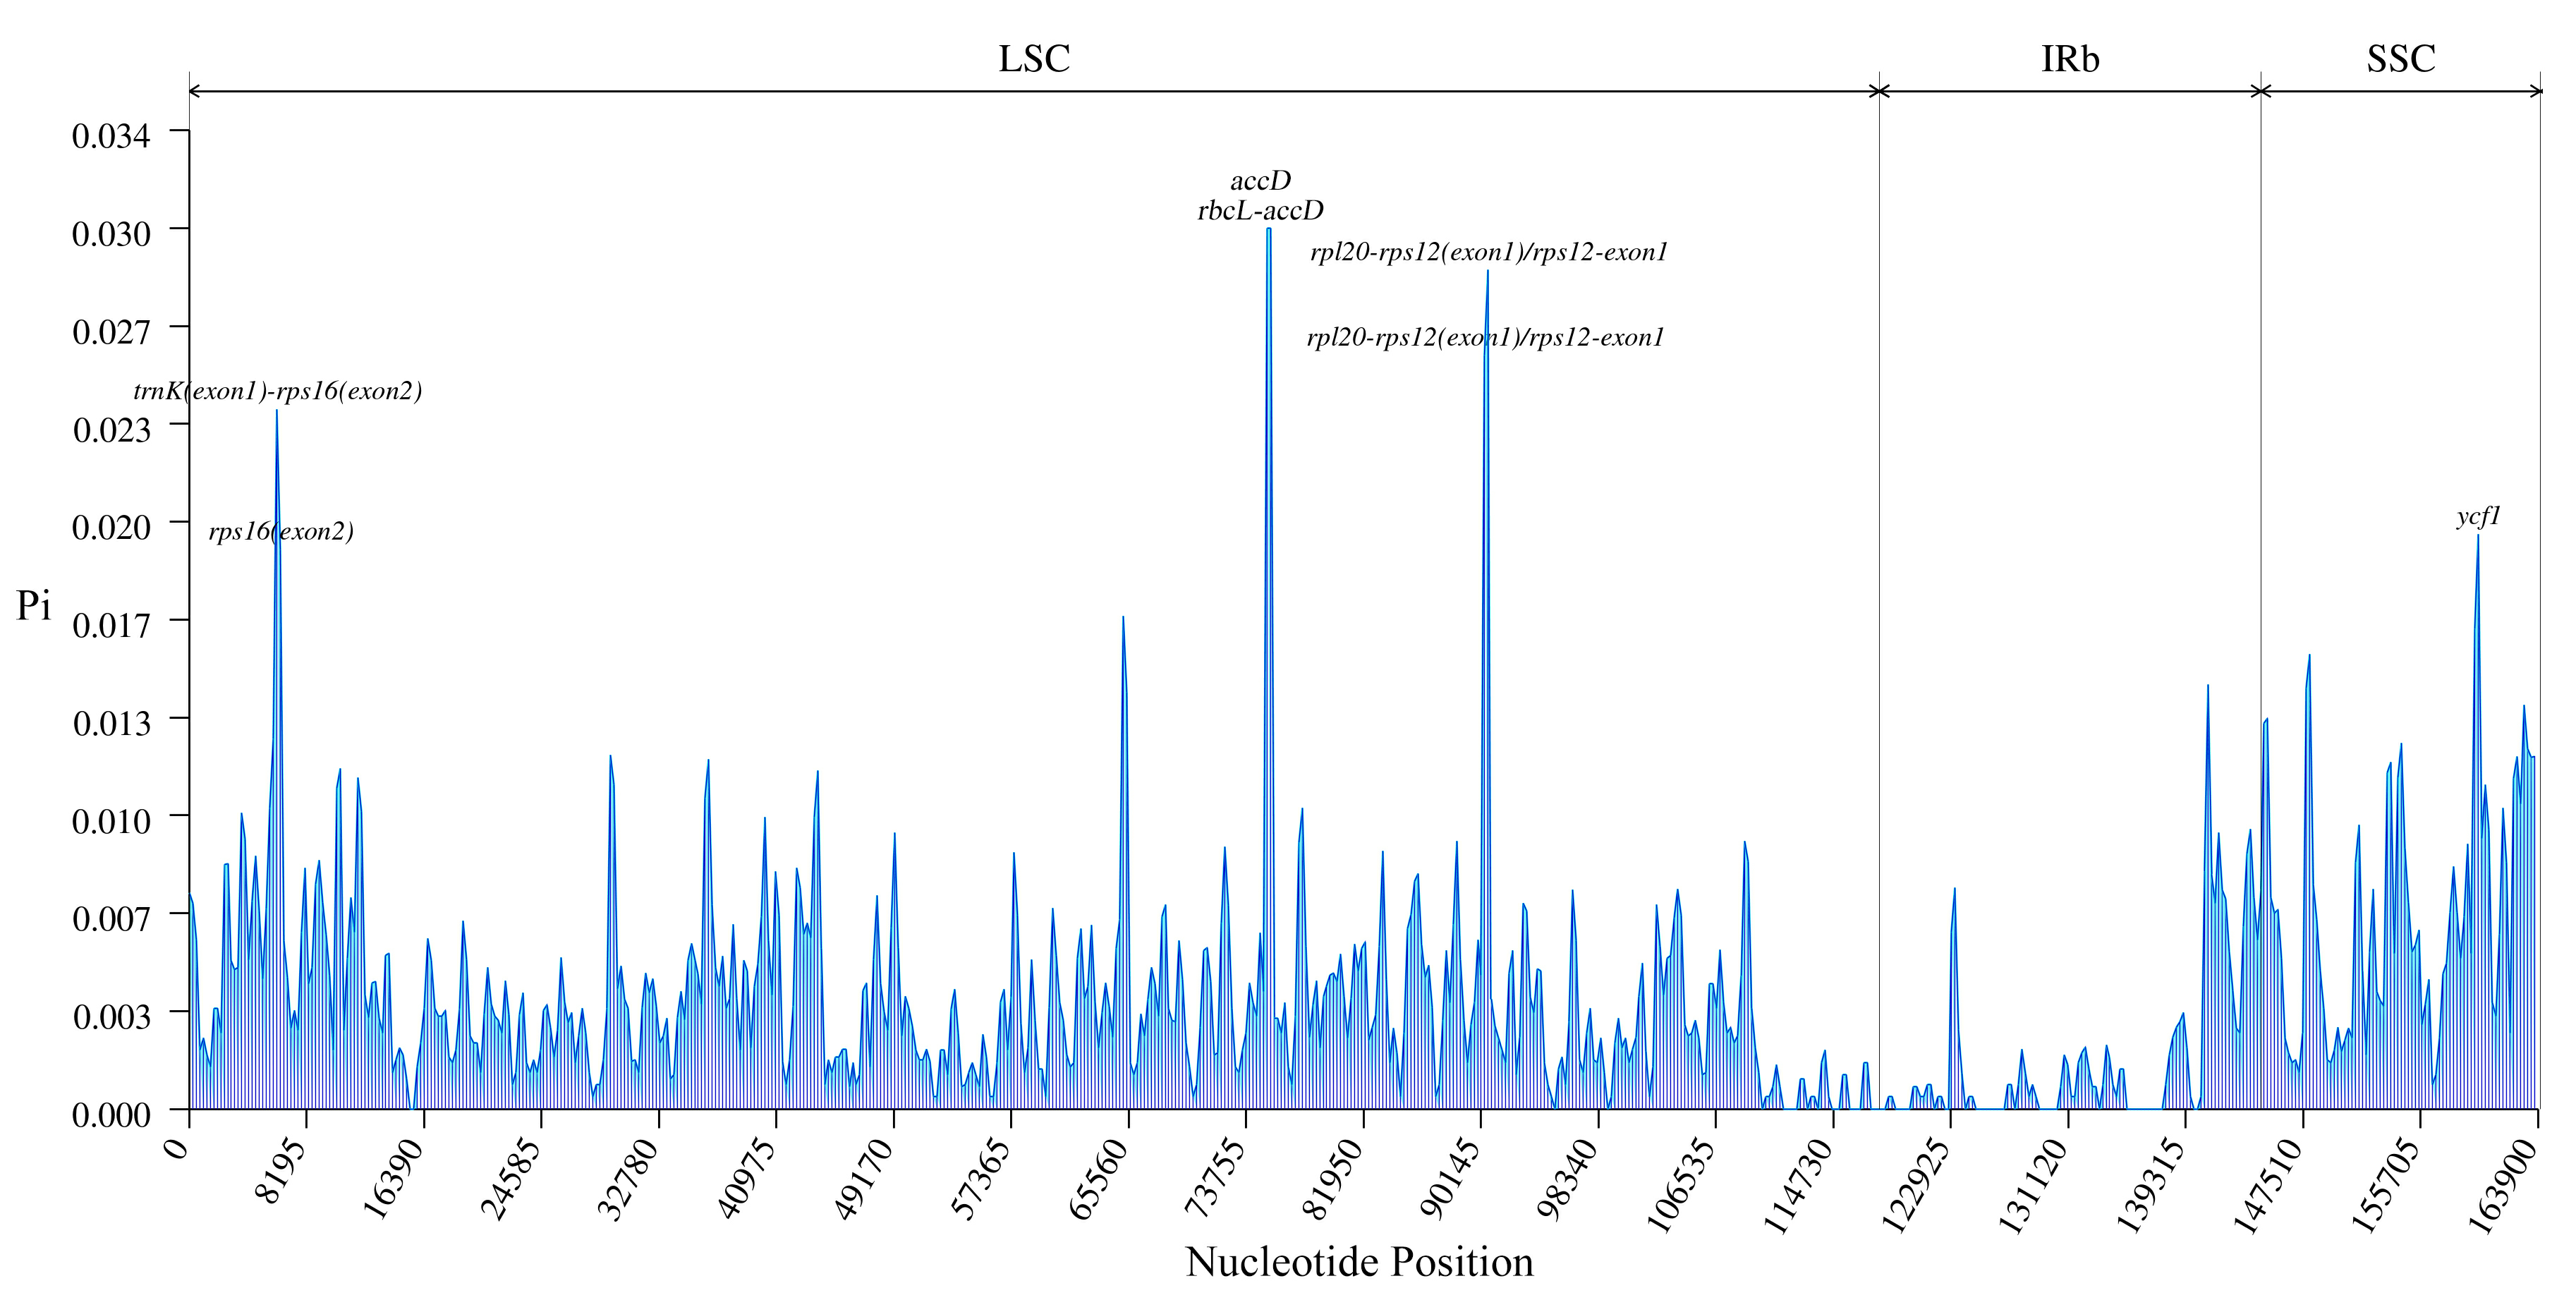


Figure S2. Gene nucleotide variability (pi) values of twelve *Lithocarpus* species. The Y-axis shows the pi values; the X-axis shows the genes.
